# Supplementary material
Source: PubMed Central journal article supplement (PMC3142637)
Supplement: Supp_Data.pdf [file Supp_Data.pdf]

## Supplementary Data

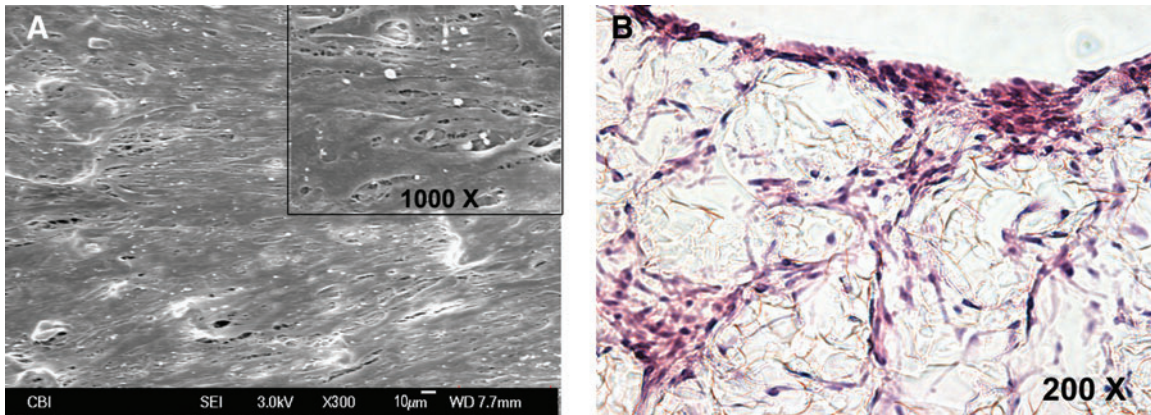

**SUPPLEMENTARY FIG. S1.** (A) Scanning electron microscope images of smooth muscle cells cultured on poly(glycerol sebacate) scaffold (21 days), and (B) hematoxylin and eosin staining showed the cross-sectional view of the constructs, 200 $\times$ .

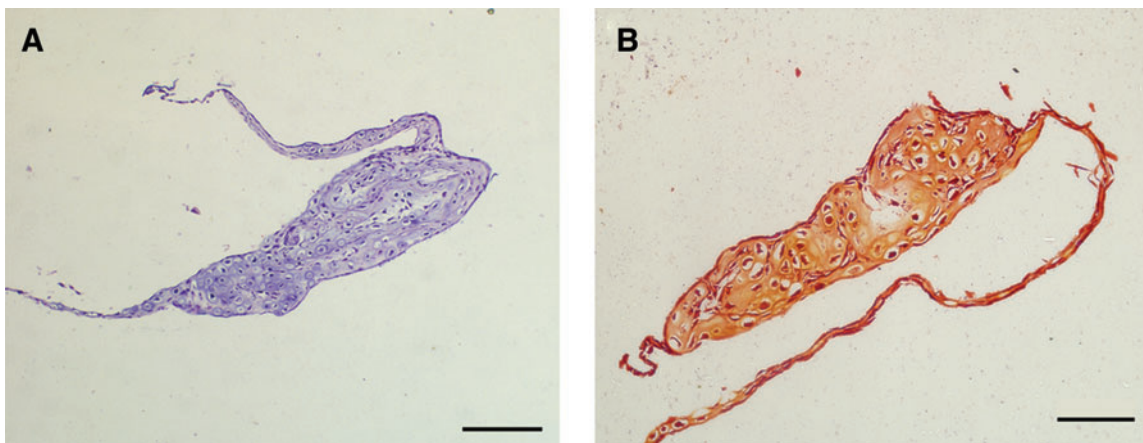

**SUPPLEMENTARY FIG. S2.** (A) Hematoxylin and eosin staining of cell aggregate formed on TCPS (21 days), and (B) Safranin-O staining showed glycosaminoglycan-enriched extracellular matrix. 200 $\times$ , scale bars = 50  $\mu$ m.

SUPPLEMENTARY TABLE S1. ANOVA FOR QUANTITATIVE COMPARISONS

| <i>Comparison</i>             | <i>Statistical test</i>             | <i>Test statistic</i> | <i>p-Value</i> |
|-------------------------------|-------------------------------------|-----------------------|----------------|
| Cell Capture                  | One-Way ANOVA                       | F(2,9)=9.14           | 0.007          |
|                               | Levene's test                       | F(2,9)=2.02           | 0.188          |
| DNA Quantification            | Factorial ANOVA                     | F=149.90              | <0.001         |
|                               | Levene's test (for factorial ANOVA) | F=6.60                | 0.01           |
|                               | One-way ANOVA, Day 3                | F(2,9)=39.17          | <0.001         |
|                               | Levene's test (for Day 3)           | F(2,9)=0.20           | 0.882          |
|                               | One-way ANOVA, Day 10               | F(2,9)=39.69          | <0.001         |
| Percent Tissue Weight         | Levene's test (for Day 10)          | F(2,9)=0.690          | 0.526          |
|                               | One-way ANOVA                       | F(2,6)=3.52           | 0.098          |
|                               | Levene's test                       | F(2,6)=0.339          | 0.725          |
| Cellularity Per Area          | One-way ANOVA                       | F(2,17)=26.91         | <0.001         |
|                               | Levene's test                       | F(2,15)=0.0           | 0.046          |
| Collagen                      | One-way ANOVA                       | F(2,9)=30.01          | <0.001         |
|                               | Levene's test                       | F(2,9)=1.94           | 0.200          |
| Collagen Per DNA              | One-way ANOVA                       | F(2,9)=0.575          | 0.582          |
|                               | Levene's test                       | F(2,9)=0.885          | 0.446          |
| Insoluble Elastin             | One-way ANOVA                       | F(2,9)=28.15          | 0.001          |
|                               | Levene's test                       | F(2,9)=1.40           | 0.297          |
| Insoluble Elastin Per DNA     | One-way ANOVA                       | F(2,9)=6.38           | 0.019          |
|                               | Levene's test                       | F(2,9)=1.48           | 0.278          |
| Alkaline Phosphatase Activity | One-way ANOVA                       | F(3,12)=719           | <0.001         |
|                               | Levene's test                       | F(3,12)=4.66          | 0.022          |

SUPPLEMENTARY TABLE S2. POST-HOC TESTS FOR QUANTITATIVE COMPARISONS

| <i>Comparison</i>         | <i>Post-hoc test</i>           | <i>p-Values</i>      |                         |                           |
|---------------------------|--------------------------------|----------------------|-------------------------|---------------------------|
|                           |                                | <i>P-PGS vs. PGS</i> | <i>PL-P-PGS vs. PGS</i> | <i>PL-P-PGS vs. P-PGS</i> |
| Cell Capture              | Tukey's HSD                    | 0.010                | 0.015                   | 0.963                     |
| DNA Quantification Day 3  | Tukey's HSD ( $\alpha=0.025$ ) | 0.001                | <0.001                  | 0.047                     |
| DNA Quantification Day 10 | Tukey's HSD ( $\alpha=0.025$ ) | 0.001                | <0.001                  | 0.013                     |
| Percent Tissue Weight     | Tukey's HSD                    | 0.823                | 0.097                   | 0.210                     |
| Cellularity Per Area      | Games-Howell                   | 0.003                | 0.001                   | 0.018                     |
| Collagen                  | Tukey's HSD                    | 0.947                | <0.001                  | <0.001                    |
| Insoluble Elastin         | Tukey's HSD                    | 0.516                | <0.001                  | 0.001                     |
|                           |                                | <i>S-PGS vs. PGS</i> | <i>S-PGS vs. P-PGS</i>  | <i>S-PGS vs. PL-P-PGS</i> |
| Collagen                  | Tukey's HSD                    | <0.001               | <0.001                  | <0.001                    |
| Collagen Per DNA          | Games-Howell                   | <0.001               | <0.001                  | <0.001                    |
| Insoluble Elastin         | Tukey's HSD                    | 0.002                | <0.001                  | <0.001                    |
| Insoluble Elastin Per DNA | Games-Howell                   | <0.001               | <0.001                  | <0.001                    |
